# Supplementary material
Source: publisher site journal article supplement (https://www.dovepress.com/article/409841)
Supplement: Supplementary file 1 [file get_supplementary_file.php]

**Appendix 1. Performance metric definitions for deep learning**

**Accuracy**: Accuracy measures the proportion of correctly classified instances to the total number of instances.

Calculation: (Number of correctly classified instances) / (Total number of instances)

**Precision**: Precision measures the proportion of true positive predictions to the total number of positive predictions.

Calculation: (True Positives) / (True Positives + False Positives)

**Recall**: Recall, also known as sensitivity or true positive rate, measures the proportion of true positive predictions to the total number of actual positive instances.

Calculation: (True Positives) / (True Positives + False Negatives)

**F1 Score**: The F1 score is the harmonic mean of precision and recall. It provides a single metric that balances the trade-off between precision and recall.

Calculation: 2 * ((Precision * Recall) / (Precision + Recall))

**Area Under the Curve (AUC)**: AUC represents the area under the receiver operating characteristic (ROC) curve. It assesses the model's ability to distinguish between positive and negative instances across different classification thresholds.

Calculation: The AUC is typically calculated by plotting the true positive rate (TPR) against the false positive rate (FPR) and calculating the area under this curve.
